# Supplementary material
Source: PubMed Central journal article supplement (PMC2866009)

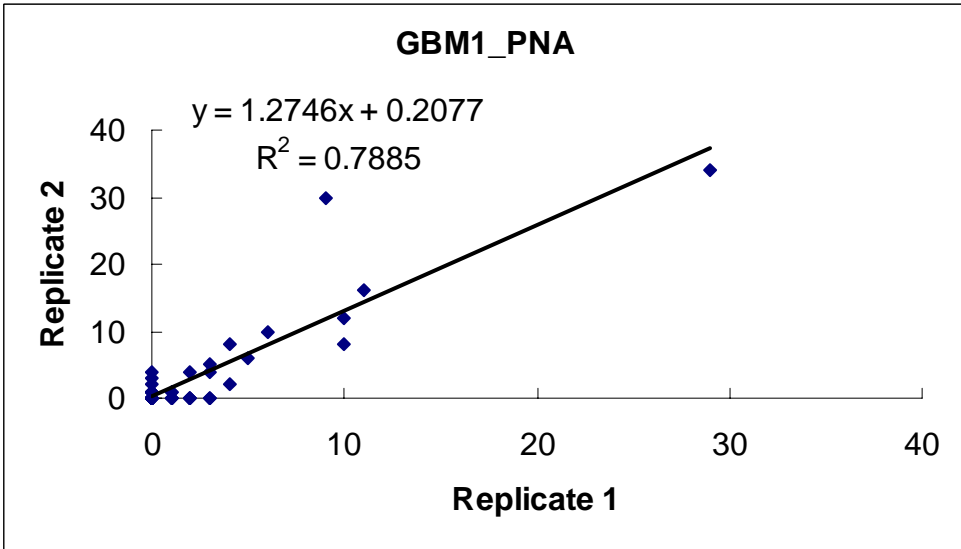

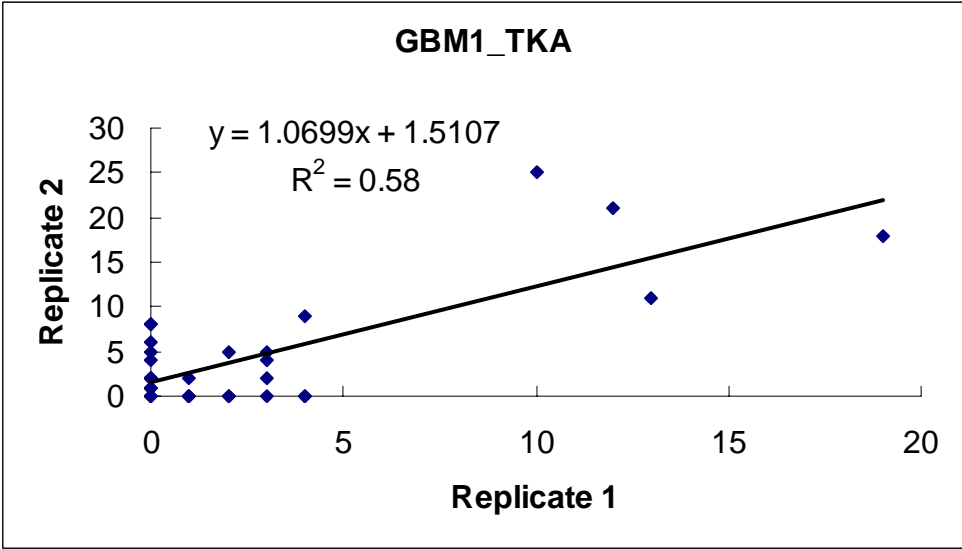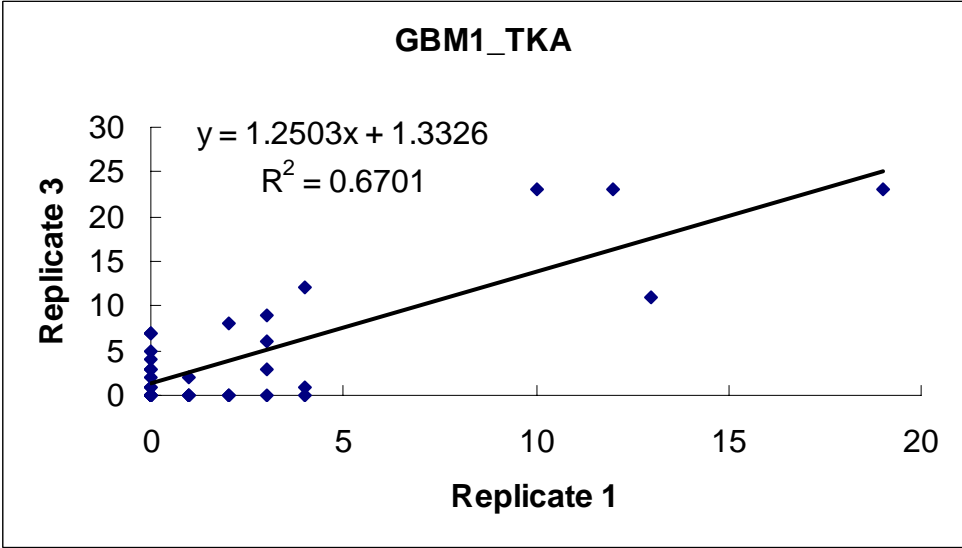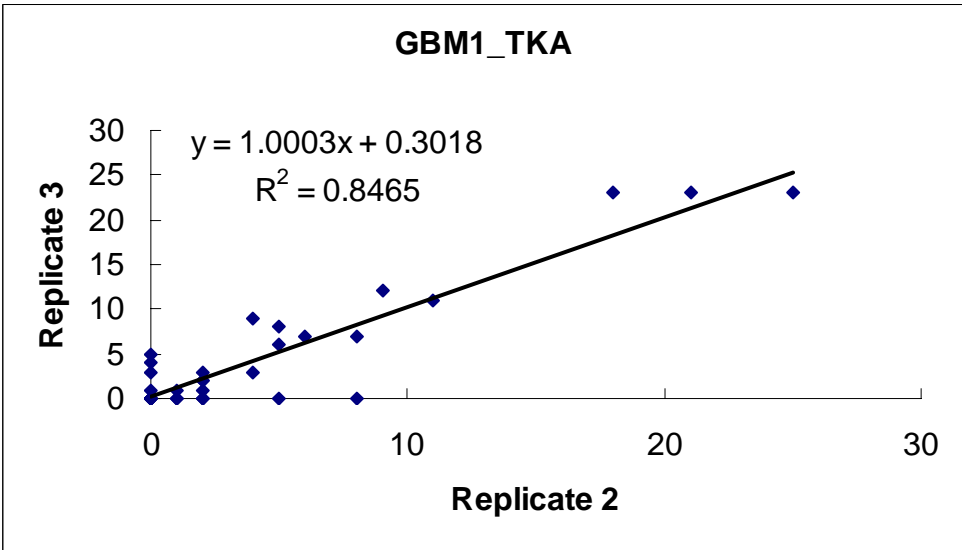

Supplement: NIHMS190963-supplement-9_si_009.pdf [file NIHMS190963-supplement-9_si_009.pdf]
